# Supplementary material for: The role of ion–water interactions in determining the Soret coefficient of LiCl aqueous solutions
Source: Royal Society of Chemistry journal article supplement (doi:10.1039/c7cp01241a), 2017-01-01
Supplement: c7cp01241a1.pdf [file c7cp01241a1.pdf]

Cite this: DOI: 10.1039/xxxxxxxxxx

## The role of ion-water interactions in determining the Soret coefficient of LiCl aqueous solutions

Silvia Di Lecce<sup>a</sup>, Tim Albrecht,<sup>a</sup> and Fernando Bresme<sup>a,b,\*</sup>

| $T$ [K] | $b$ [kg mol <sup>-1</sup> ] | $s_T \times 10^3$ [K <sup>-1</sup> ] |
|---------|-----------------------------|--------------------------------------|
| 250     | $0.964 \pm 0.033$           | $-3.023 \pm 0.273$                   |
|         | $1.472 \pm 0.036$           | $-4.140 \pm 0.323$                   |
|         | $1.989 \pm 0.047$           | $-4.060 \pm 0.181$                   |
|         | $2.524 \pm 0.036$           | $-4.641 \pm 0.118$                   |
|         | $3.016 \pm 0.038$           | $-4.163 \pm 0.154$                   |
|         | $3.582 \pm 0.065$           | $-3.237 \pm 0.559$                   |
|         | $4.166 \pm 0.062$           | $-2.398 \pm 0.464$                   |
|         | $4.722 \pm 0.052$           | $-2.604 \pm 0.070$                   |
|         | $5.359 \pm 0.053$           | $-2.293 \pm 0.032$                   |
| 260     | $0.992 \pm 0.031$           | $-2.427 \pm 0.262$                   |
|         | $1.527 \pm 0.032$           | $-2.978 \pm 0.302$                   |
|         | $2.059 \pm 0.043$           | $-2.627 \pm 0.303$                   |
|         | $2.622 \pm 0.036$           | $-2.822 \pm 0.075$                   |
|         | $3.132 \pm 0.042$           | $-3.079 \pm 0.013$                   |
|         | $3.692 \pm 0.050$           | $-2.565 \pm 0.327$                   |
|         | $4.265 \pm 0.047$           | $-2.101 \pm 0.291$                   |
|         | $4.842 \pm 0.050$           | $-2.206 \pm 0.053$                   |
|         | $5.480 \pm 0.053$           | $-1.995 \pm 0.024$                   |

| $T$ [K] | $b$ [kg mol <sup>-1</sup> ] | $s_T \times 10^3$ [K <sup>-1</sup> ] |
|---------|-----------------------------|--------------------------------------|
| 280     | $1.029 \pm 0.027$           | $-1.329 \pm 0.242$                   |
|         | $1.590 \pm 0.026$           | $-1.315 \pm 0.199$                   |
|         | $2.129 \pm 0.033$           | $-1.026 \pm 0.250$                   |
|         | $2.715 \pm 0.032$           | $-1.009 \pm 0.092$                   |
|         | $3.274 \pm 0.039$           | $-1.643 \pm 0.119$                   |
|         | $3.842 \pm 0.038$           | $-1.608 \pm 0.086$                   |
|         | $4.419 \pm 0.034$           | $-1.592 \pm 0.083$                   |
|         | $5.023 \pm 0.048$           | $-1.609 \pm 0.030$                   |
|         | $5.669 \pm 0.053$           | $-1.538 \pm 0.014$                   |
| 300     | $1.045 \pm 0.023$           | $-0.187 \pm 0.221$                   |
|         | $1.612 \pm 0.022$           | $-0.082 \pm 0.118$                   |
|         | $2.153 \pm 0.026$           | $-0.183 \pm 0.088$                   |
|         | $2.744 \pm 0.029$           | $-0.194 \pm 0.063$                   |
|         | $3.349 \pm 0.032$           | $-0.685 \pm 0.109$                   |
|         | $3.938 \pm 0.036$           | $-0.904 \pm 0.004$                   |
|         | $4.541 \pm 0.032$           | $-1.114 \pm 0.020$                   |
|         | $5.162 \pm 0.047$           | $-1.138 \pm 0.015$                   |
|         | $5.824 \pm 0.053$           | $-1.169 \pm 0.006$                   |

**Table S1** Soret coefficient as a function of LiCl molality and temperature (at 250 K and 260 K), obtained with the method implemented in GROMACS. The NEMD simulations were performed using the system equilibrated at an average pressure of 600 bar.

**Table S2** Same as Table S1 for the temperatures 280 K and 300 K.

<sup>a</sup> Department of Chemistry, Imperial College London, London, SW7 2AZ, United Kingdom.

<sup>b</sup> Department of Chemistry, Norwegian University of Science and Technology, Trondheim, Norway.

\*e-mail: [silvia.di-lecce12@imperial.ac.uk](mailto:silvia.di-lecce12@imperial.ac.uk), [fbresme@imperial.ac.uk](mailto:fbresme@imperial.ac.uk)

| $T$ [K]       | $b$ [kg mol <sup>-1</sup> ] | $s_T \times 10^3$ [K <sup>-1</sup> ] |
|---------------|-----------------------------|--------------------------------------|
| 310           | 1.044 ± 0.021               | 0.360 ± 0.211                        |
|               | 1.609 ± 0.022               | 0.374 ± 0.106                        |
|               | 2.154 ± 0.025               | 0.055 ± 0.012                        |
|               | 2.747 ± 0.027               | 0.008 ± 0.047                        |
|               | 3.366 ± 0.029               | -0.360 ± 0.082                       |
|               | 3.968 ± 0.037               | -0.646 ± 0.013                       |
|               | 4.585 ± 0.034               | -0.902 ± 0.036                       |
|               | 5.214 ± 0.047               | -0.955 ± 0.010                       |
| 5.886 ± 0.054 | -1.023 ± 0.005              |                                      |
| 320           | 1.037 ± 0.018               | 0.951 ± 0.201                        |
|               | 1.599 ± 0.023               | 0.789 ± 0.129                        |
|               | 2.151 ± 0.025               | 0.237 ± 0.061                        |
|               | 2.744 ± 0.026               | 0.150 ± 0.032                        |
|               | 3.374 ± 0.027               | -0.079 ± 0.046                       |
|               | 3.990 ± 0.038               | -0.411 ± 0.006                       |
|               | 4.623 ± 0.036               | -0.683 ± 0.035                       |
|               | 5.262 ± 0.047               | -0.783 ± 0.005                       |
| 5.945 ± 0.054 | -0.883 ± 0.004              |                                      |
| 330           | 1.024 ± 0.016               | 1.497 ± 0.191                        |
|               | 1.585 ± 0.026               | 1.111 ± 0.212                        |
|               | 2.145 ± 0.027               | 0.356 ± 0.118                        |
|               | 2.739 ± 0.025               | 0.236 ± 0.020                        |
|               | 3.373 ± 0.026               | 0.127 ± 0.011                        |
|               | 4.002 ± 0.038               | -0.230 ± 0.010                       |
|               | 4.649 ± 0.038               | -0.492 ± 0.021                       |
|               | 5.298 ± 0.047               | -0.645 ± 0.002                       |
| 5.993 ± 0.054 | -0.770 ± 0.004              |                                      |

**Table S3** Same as Table S1 for temperature interval between 310 K and 330 K.

| $T$ [K]       | $b$ [kg mol <sup>-1</sup> ] | $s_T \times 10^3$ [K <sup>-1</sup> ] |
|---------------|-----------------------------|--------------------------------------|
| 340           | 1.024 ± 0.016               | 1.497 ± 0.191                        |
|               | 1.585 ± 0.026               | 1.111 ± 0.212                        |
|               | 2.145 ± 0.027               | 0.356 ± 0.118                        |
|               | 2.739 ± 0.025               | 0.236 ± 0.020                        |
|               | 3.373 ± 0.026               | 0.127 ± 0.011                        |
|               | 4.002 ± 0.038               | -0.230 ± 0.010                       |
|               | 4.649 ± 0.038               | -0.492 ± 0.021                       |
|               | 5.298 ± 0.047               | -0.645 ± 0.002                       |
| 5.993 ± 0.054 | -0.770 ± 0.004              |                                      |
| 350           | 0.983 ± 0.012               | 2.631 ± 0.170                        |
|               | 1.541 ± 0.034               | 1.631 ± 0.379                        |
|               | 2.126 ± 0.034               | 0.506 ± 0.208                        |
|               | 2.723 ± 0.025               | 0.332 ± 0.009                        |
|               | 3.353 ± 0.027               | 0.436 ± 0.063                        |
|               | 4.008 ± 0.035               | 0.061 ± 0.063                        |
|               | 4.678 ± 0.037               | -0.123 ± 0.060                       |
|               | 5.354 ± 0.048               | -0.412 ± 0.002                       |
| 6.074 ± 0.055 | -0.575 ± 0.003              |                                      |
| 360           | 0.956 ± 0.010               | 3.174 ± 0.161                        |
|               | 1.516 ± 0.040               | 1.824 ± 0.455                        |
|               | 2.115 ± 0.038               | 0.548 ± 0.239                        |
|               | 2.714 ± 0.024               | 0.356 ± 0.016                        |
|               | 3.337 ± 0.030               | 0.541 ± 0.096                        |
|               | 4.003 ± 0.032               | 0.168 ± 0.093                        |
|               | 4.680 ± 0.034               | 0.041 ± 0.090                        |
|               | 5.373 ± 0.048               | -0.321 ± 0.004                       |
| 6.105 ± 0.056 | -0.498 ± 0.002              |                                      |

**Table S4** Same as Table S1 for temperature interval between 340 K and 360 K.

| $T$ [K] | $b$ [kg mol <sup>-1</sup> ] | $s_T \times 10^3$ [K <sup>-1</sup> ] |
|---------|-----------------------------|--------------------------------------|
| 240     | 0.960 ± 0.035               | -3.740 ± 0.281                       |
|         | 2.419 ± 0.028               | -6.514 ± 0.664                       |
|         | 4.087 ± 0.06                | -3.867 ± 0.505                       |
| 250     | 0.993 ± 0.033               | -3.189 ± 0.260                       |
|         | 2.553 ± 0.040               | -4.774 ± 0.256                       |
|         | 4.229 ± 0.046               | -3.215 ± 0.317                       |
| 260     | 1.023 ± 0.032               | -2.592 ± 0.236                       |
|         | 2.663 ± 0.045               | -3.329 ± 0.029                       |
|         | 4.359 ± 0.036               | -2.611 ± 0.17                        |
| 270     | 1.046 ± 0.030               | -2.042 ± 0.215                       |
|         | 2.736 ± 0.044               | -2.306 ± 0.128                       |
|         | 4.460 ± 0.032               | -2.133 ± 0.077                       |
| 280     | 1.064 ± 0.029               | -1.493 ± 0.194                       |
|         | 2.786 ± 0.041               | -1.514 ± 0.183                       |
|         | 4.543 ± 0.030               | -1.721 ± 0.014                       |
| 290     | 1.078 ± 0.027               | -0.899 ± 0.170                       |
|         | 2.820 ± 0.036               | -0.856 ± 0.190                       |
|         | 4.616 ± 0.031               | -1.340 ± 0.027                       |
| 300     | 1.084 ± 0.026               | -0.352 ± 0.162                       |
|         | 2.837 ± 0.031               | -0.390 ± 0.168                       |
|         | 4.669 ± 0.033               | -1.038 ± 0.045                       |

| $T$ [K] | $b$ [kg mol <sup>-1</sup> ] | $s_T \times 10^3$ [K <sup>-1</sup> ] |
|---------|-----------------------------|--------------------------------------|
| 310     | 1.085 ± 0.024               | 0.196 ± 0.162                        |
|         | 2.843 ± 0.027               | -0.029 ± 0.129                       |
|         | 4.710 ± 0.036               | -0.779 ± 0.049                       |
| 320     | 1.080 ± 0.023               | 0.787 ± 0.162                        |
|         | 2.839 ± 0.024               | 0.271 ± 0.079                        |
|         | 4.743 ± 0.038               | -0.538 ± 0.042                       |
| 330     | 1.069 ± 0.022               | 1.333 ± 0.163                        |
|         | 2.828 ± 0.022               | 0.483 ± 0.070                        |
|         | 4.763 ± 0.022               | -0.347 ± 0.027                       |
| 340     | 1.05 ± 0.02                 | 1.923 ± 0.163                        |
|         | 2.811 ± 0.022               | 0.659 ± 0.059                        |
|         | 4.776 ± 0.041               | -0.171 ± 0.005                       |
| 350     | 1.028 ± 0.020               | 2.467 ± 0.163                        |
|         | 2.792 ± 0.023               | 0.784 ± 0.068                        |
|         | 4.780 ± 0.041               | -0.031 ± 0.019                       |
| 360     | 1.002 ± 0.164               | 3.011 ± 0.019                        |
|         | 2.769 ± 0.110               | 0.880 ± 0.025                        |
|         | 4.779 ± 0.045               | 0.089 ± 0.039                        |

**Table S6** Same as Table S5 for the temperature interval between 310 K and 360 K.

**Table S5** Same as Table S1 for the temperature interval between 240 K and 300 K and using the LAMMPS implementation.

| $T$ [K] | $b$ [kg mol <sup>-1</sup> ] | $s_T \times 10^3$ [K <sup>-1</sup> ] |
|---------|-----------------------------|--------------------------------------|
| 250     | 0.966 ± 0.029               | -2.867 ± 0.235                       |
|         | 2.468 ± 0.036               | -4.387 ± 0.182                       |
|         | 4.098 ± 0.067               | -3.145 ± 0.267                       |
| 260     | 0.993 ± 0.027               | -2.305 ± 0.226                       |
|         | 2.568 ± 0.040               | -3.203 ± 0.007                       |
|         | 4.223 ± 0.058               | -2.618 ± 0.206                       |
| 280     | 1.028 ± 0.024               | -1.271 ± 0.209                       |
|         | 2.688 ± 0.037               | -1.683 ± 0.120                       |
|         | 4.407 ± 0.047               | -1.833 ± 0.123                       |
| 300     | 1.043 ± 0.020               | -0.196 ± 0.191                       |
|         | 2.752 ± 0.032               | -0.711 ± 0.078                       |
|         | 4.543 ± 0.040               | -1.221 ± 0.066                       |
| 310     | 1.042 ± 0.018               | 0.319 ± 0.182                        |
|         | 2.766 ± 0.031               | -0.391 ± 0.034                       |
|         | 4.591 ± 0.038               | -0.985 ± 0.046                       |
| 320     | 1.036 ± 0.016               | 0.876 ± 0.173                        |
|         | 2.773 ± 0.031               | -0.121 ± 0.020                       |
|         | 4.633 ± 0.037               | -0.765 ± 0.029                       |
| 330     | 1.024 ± 0.014               | 1.390 ± 0.164                        |
|         | 2.774 ± 0.032               | 0.073 ± 0.071                        |
|         | 4.664 ± 0.036               | -0.589 ± 0.016                       |
| 340     | 1.007 ± 0.012               | 1.946 ± 0.155                        |
|         | 2.769 ± 0.035               | 0.237 ± 0.124                        |
|         | 4.688 ± 0.036               | -0.425 ± 0.009                       |
| 350     | 0.986 ± 0.010               | 2.458 ± 0.147                        |
|         | 2.761 ± 0.039               | 0.355 ± 0.170                        |
|         | 4.704 ± 0.036               | -0.294 ± 0.012                       |
| 360     | 0.960 ± 0.009               | 2.970 ± 0.138                        |
|         | 2.751 ± 0.043               | 0.448 ± 0.212                        |
|         | 4.715 ± 0.036               | -0.181 ± 0.015                       |

**Table S7** Same as Table S1 for average pressure 100 bar for temperature interval between 250 K and 360 K.

| $T$ [K] | $b$ [kg mol <sup>-1</sup> ] | $s_T \times 10^3$ [K <sup>-1</sup> ] |
|---------|-----------------------------|--------------------------------------|
| 240     | 1.007 ± 0.030               | -2.733 ± 0.171                       |
|         | 2.002 ± 0.054               | -6.624 ± 0.628                       |
|         | 3.125 ± 0.055               | -4.407 ± 0.425                       |
|         | 4.130 ± 0.076               | -4.131 ± 0.608                       |
| 250     | 1.030 ± 0.030               | -1.993 ± 0.202                       |
|         | 2.099 ± 0.047               | -3.470 ± 0.378                       |
|         | 3.220 ± 0.056               | -2.082 ± 0.226                       |
|         | 4.271 ± 0.059               | -2.891 ± 0.360                       |
| 260     | 1.048 ± 0.028               | -1.269 ± 0.288                       |
|         | 2.152 ± 0.041               | -1.460 ± 0.218                       |
|         | 3.266 ± 0.057               | -0.768 ± 0.094                       |
|         | 4.378 ± 0.048               | -1.912 ± 0.194                       |
| 270     | 1.058 ± 0.025               | -0.666 ± 0.310                       |
|         | 2.170 ± 0.038               | -0.373 ± 0.131                       |
|         | 3.280 ± 0.057               | -0.138 ± 0.021                       |
|         | 4.445 ± 0.043               | -1.254 ± 0.103                       |
| 280     | 1.062 ± 0.022               | -0.120 ± 0.291                       |
|         | 2.171 ± 0.036               | 0.280 ± 0.079                        |
|         | 3.278 ± 0.057               | 0.199 ± 0.023                        |
|         | 4.488 ± 0.040               | -0.768 ± 0.050                       |
| 290     | 1.060 ± 0.019               | 0.414 ± 0.232                        |
|         | 2.159 ± 0.034               | 0.695 ± 0.046                        |
|         | 3.268 ± 0.057               | 0.389 ± 0.050                        |
|         | 4.515 ± 0.039               | -0.385 ± 0.021                       |
| 300     | 1.054 ± 0.017               | 0.859 ± 0.152                        |
|         | 2.142 ± 0.033               | 0.920 ± 0.032                        |
|         | 3.254 ± 0.057               | 0.480 ± 0.065                        |
|         | 4.526 ± 0.038               | -0.127 ± 0.009                       |

**Table S8** Soret coefficient as a function of LiCl molality for the system with cation size  $\sigma_{Li^+, +0.05} = 0.1006$  nm, and temperature range 240 K – 300 K. NEMD simulation were performed using the system equilibrated at an average pressure of 600 bar.

| $T$ [K] | $b$ [kg mol <sup>-1</sup> ] | $s_T \times 10^3$ [K <sup>-1</sup> ] |
|---------|-----------------------------|--------------------------------------|
| 310     | 1.043 ± 0.015               | 1.262 ± 0.052                        |
|         | 2.122 ± 0.032               | 1.055 ± 0.036                        |
|         | 3.238 ± 0.057               | 0.529 ± 0.073                        |
|         | 4.527 ± 0.038               | 0.063 ± 0.005                        |
| 320     | 1.027 ± 0.015               | 1.656 ± 0.071                        |
|         | 2.098 ± 0.032               | 1.141 ± 0.038                        |
|         | 3.220 ± 0.056               | 0.556 ± 0.078                        |
|         | 4.520 ± 0.037               | 0.214 ± 0.007                        |
| 330     | 1.009 ± 0.016               | 1.985 ± 0.195                        |
|         | 2.074 ± 0.031               | 1.187 ± 0.040                        |
|         | 3.202 ± 0.056               | 0.569 ± 0.081                        |
|         | 4.508 ± 0.037               | 0.315 ± 0.012                        |
| 340     | 0.987 ± 0.019               | 2.306 ± 0.336                        |
|         | 2.048 ± 0.031               | 1.217 ± 0.041                        |
|         | 3.183 ± 0.056               | 0.577 ± 0.083                        |
|         | 4.492 ± 0.036               | 0.395 ± 0.018                        |
| 350     | 0.964 ± 0.022               | 2.573 ± 0.471                        |
|         | 2.024 ± 0.030               | 1.233 ± 0.042                        |
|         | 3.165 ± 0.056               | 0.580 ± 0.083                        |
|         | 4.473 ± 0.035               | 0.448 ± 0.024                        |
| 360     | 0.939 ± 0.026               | 2.815 ± 0.607                        |
|         | 2.000 ± 0.030               | 1.243 ± 0.042                        |
|         | 3.148 ± 0.055               | 0.582 ± 0.084                        |
|         | 4.453 ± 0.034               | 0.488 ± 0.029                        |

**Table S9** Same as Table S8 for for temperatures between 310 K and 360 K.

| $T$ [K] | $b$ [kg mol <sup>-1</sup> ] | $s_T \times 10^3$ [K <sup>-1</sup> ] |
|---------|-----------------------------|--------------------------------------|
| 240     | 1.054 ± 0.038               | -1.562 ± 0.714                       |
|         | 2.148 ± 0.041               | -2.772 ± 0.323                       |
|         | 3.237 ± 0.061               | -2.253 ± 0.443                       |
|         | 4.491 ± 0.070               | -3.394 ± 1.128                       |
| 250     | 1.067 ± 0.032               | -1.023 ± 0.593                       |
|         | 2.193 ± 0.035               | -1.506 ± 0.281                       |
|         | 3.297 ± 0.049               | -1.562 ± 0.330                       |
|         | 4.590 ± 0.041               | -1.308 ± 0.370                       |
| 260     | 1.076 ± 0.026               | -0.440 ± 0.461                       |
|         | 2.214 ± 0.030               | -0.423 ± 0.227                       |
|         | 3.340 ± 0.040               | -0.898 ± 0.228                       |
|         | 4.620 ± 0.032               | -0.098 ± 0.078                       |
| 270     | 1.077 ± 0.022               | 0.098 ± 0.340                        |
|         | 2.215 ± 0.025               | 0.368 ± 0.175                        |
|         | 3.360 ± 0.035               | -0.355 ± 0.151                       |
|         | 4.610 ± 0.031               | 0.498 ± 0.061                        |
| 280     | 1.074 ± 0.019               | 0.635 ± 0.219                        |
|         | 2.200 ± 0.022               | 0.998 ± 0.122                        |
|         | 3.363 ± 0.031               | 0.128 ± 0.088                        |
|         | 4.580 ± 0.032               | 0.824 ± 0.048                        |
| 290     | 1.063 ± 0.017               | 1.216 ± 0.088                        |
|         | 2.171 ± 0.019               | 1.538 ± 0.069                        |
|         | 3.350 ± 0.029               | 0.592 ± 0.076                        |
|         | 4.536 ± 0.032               | 1.013 ± 0.035                        |
| 300     | 1.048 ± 0.017               | 1.752 ± 0.100                        |
|         | 2.134 ± 0.018               | 1.932 ± 0.023                        |
|         | 3.325 ± 0.028               | 0.971 ± 0.074                        |
|         | 4.490 ± 0.031               | 1.106 ± 0.027                        |

**Table S10** Same as Table S8 for  $\sigma_{Li^+, +0.05} = 0.2006$  nm in the temperature interval between 240 K and 300 K.

| $T$ [K] | $b$ [kg mol <sup>-1</sup> ] | $s_T \times 10^3$ [K <sup>-1</sup> ] |
|---------|-----------------------------|--------------------------------------|
| 310     | 1.028 ± 0.017               | 2.287 ± 0.161                        |
|         | 2.092 ± 0.018               | 2.246 ± 0.019                        |
|         | 3.289 ± 0.028               | 1.309 ± 0.065                        |
|         | 4.441 ± 0.029               | 1.157 ± 0.046                        |
| 320     | 1.001 ± 0.019               | 2.865 ± 0.283                        |
|         | 2.040 ± 0.018               | 2.515 ± 0.059                        |
|         | 3.238 ± 0.030               | 1.633 ± 0.062                        |
|         | 4.387 ± 0.026               | 1.186 ± 0.061                        |
| 330     | 0.971 ± 0.022               | 3.399 ± 0.404                        |
|         | 1.989 ± 0.019               | 2.712 ± 0.092                        |
|         | 3.183 ± 0.031               | 1.899 ± 0.078                        |
|         | 4.336 ± 0.023               | 1.201 ± 0.071                        |
| 340     | 0.934 ± 0.026               | 3.976 ± 0.534                        |
|         | 1.932 ± 0.021               | 2.880 ± 0.123                        |
|         | 3.117 ± 0.034               | 2.153 ± 0.090                        |
|         | 4.282 ± 0.019               | 1.209 ± 0.078                        |
| 350     | 0.897 ± 0.030               | 4.509 ± 0.653                        |
|         | 1.878 ± 0.023               | 3.002 ± 0.147                        |
|         | 3.049 ± 0.036               | 2.361 ± 0.096                        |
|         | 4.232 ± 0.016               | 1.214 ± 0.083                        |
| 360     | 0.856 ± 0.035               | 5.040 ± 0.773                        |
|         | 1.823 ± 0.025               | 3.100 ± 0.168                        |
|         | 2.978 ± 0.038               | 2.547 ± 0.098                        |
|         | 4.183 ± 0.012               | 1.216 ± 0.086                        |

**Table S11** Same as Table S10 for temperatures between 310 K and 360 K.

| $T$ [K] | $b$ [kg mol <sup>-1</sup> ] | $s_T \times 10^3$ [K <sup>-1</sup> ] |
|---------|-----------------------------|--------------------------------------|
| 240     | $0.994 \pm 0.055$           | $-7.262 \pm 0.761$                   |
|         | $1.901 \pm 0.070$           | $-10.560 \pm 0.757$                  |
|         | $2.999 \pm 0.163$           | $-6.723 \pm 1.907$                   |
|         | $4.316 \pm 0.103$           | $-2.788 \pm 0.087$                   |
| 250     | $1.052 \pm 0.051$           | $-4.561 \pm 0.682$                   |
|         | $2.067 \pm 0.084$           | $-7.025 \pm 0.142$                   |
|         | $3.175 \pm 0.124$           | $-5.165 \pm 1.284$                   |
|         | $4.424 \pm 0.102$           | $-2.336 \pm 0.086$                   |
| 260     | $1.090 \pm 0.046$           | $-2.278 \pm 0.569$                   |
|         | $2.190 \pm 0.086$           | $-4.160 \pm 0.291$                   |
|         | $3.325 \pm 0.095$           | $-3.683 \pm 0.786$                   |
|         | $4.522 \pm 0.100$           | $-1.847 \pm 0.085$                   |
| 270     | $1.105 \pm 0.042$           | $-0.635 \pm 0.455$                   |
|         | $2.257 \pm 0.080$           | $-2.183 \pm 0.431$                   |
|         | $3.425 \pm 0.077$           | $-2.482 \pm 0.457$                   |
|         | $4.594 \pm 0.098$           | $-1.395 \pm 0.084$                   |
| 280     | $1.104 \pm 0.037$           | $0.658 \pm 0.340$                    |
|         | $2.288 \pm 0.072$           | $-0.687 \pm 0.444$                   |
|         | $3.490 \pm 0.068$           | $-1.422 \pm 0.229$                   |
|         | $4.646 \pm 0.095$           | $-0.945 \pm 0.083$                   |
| 290     | $1.090 \pm 0.034$           | $1.752 \pm 0.221$                    |
|         | $2.289 \pm 0.062$           | $0.526 \pm 0.374$                    |
|         | $3.523 \pm 0.063$           | $-0.414 \pm 0.074$                   |
|         | $4.680 \pm 0.092$           | $-0.457 \pm 0.082$                   |
| 300     | $1.068 \pm 0.031$           | $2.538 \pm 0.120$                    |
|         | $2.268 \pm 0.055$           | $1.363 \pm 0.311$                    |
|         | $3.523 \pm 0.062$           | $0.403 \pm 0.003$                    |
|         | $4.690 \pm 0.088$           | $-0.008 \pm 0.081$                   |

**Table S12** Soret coefficient as a function of LiCl molality for the system with anion size  $\sigma_{Cl^-,-0.05} = 0.3901$  nm, and temperature range between 240 K and 300 K. NEMD simulation were performed using the system equilibrated at an average pressure of 600 bar.

| $T$ [K] | $b$ [kg mol <sup>-1</sup> ] | $s_T \times 10^3$ [K <sup>-1</sup> ] |
|---------|-----------------------------|--------------------------------------|
| 310     | $1.039 \pm 0.030$           | $3.158 \pm 0.064$                    |
|         | $2.231 \pm 0.050$           | $1.996 \pm 0.273$                    |
|         | $3.497 \pm 0.062$           | $1.125 \pm 0.026$                    |
|         | $4.681 \pm 0.084$           | $0.441 \pm 0.080$                    |
| 320     | $1.002 \pm 0.029$           | $3.681 \pm 0.059$                    |
|         | $2.179 \pm 0.047$           | $2.509 \pm 0.217$                    |
|         | $3.443 \pm 0.062$           | $1.811 \pm 0.010$                    |
|         | $4.647 \pm 0.080$           | $0.927 \pm 0.078$                    |
| 330     | $0.965 \pm 0.029$           | $4.058 \pm 0.130$                    |
|         | $2.123 \pm 0.048$           | $2.863 \pm 0.160$                    |
|         | $3.374 \pm 0.060$           | $2.367 \pm 0.040$                    |
|         | $4.596 \pm 0.075$           | $1.375 \pm 0.077$                    |
| 340     | $0.923 \pm 0.029$           | $4.376 \pm 0.196$                    |
|         | $2.057 \pm 0.051$           | $3.150 \pm 0.278$                    |
|         | $3.283 \pm 0.056$           | $2.896 \pm 0.118$                    |
|         | $4.519 \pm 0.070$           | $1.859 \pm 0.076$                    |
| 350     | $0.884 \pm 0.030$           | $4.605 \pm 0.248$                    |
|         | $1.994 \pm 0.056$           | $3.348 \pm 0.391$                    |
|         | $3.186 \pm 0.049$           | $3.324 \pm 0.209$                    |
|         | $4.429 \pm 0.066$           | $2.306 \pm 0.075$                    |
| 360     | $0.845 \pm 0.031$           | $4.786 \pm 0.293$                    |
|         | $1.929 \pm 0.063$           | $3.497 \pm 0.493$                    |
|         | $3.079 \pm 0.040$           | $3.703 \pm 0.312$                    |
|         | $4.322 \pm 0.061$           | $2.753 \pm 0.075$                    |

**Table S13** Same as Table S1 for temperature interval between 310 K and 360 K.

| $T$ [K] | $b$ [kg mol <sup>-1</sup> ] | $s_T \times 10^3$ [K <sup>-1</sup> ] |
|---------|-----------------------------|--------------------------------------|
| 240     | 0.845 ± 0.034               | -5.255 ± 1.376                       |
|         | 1.733 ± 0.024               | -6.309 ± 0.037                       |
|         | 2.690 ± 0.055               | -6.421 ± 0.557                       |
|         | 3.829 ± 0.036               | -3.897 ± 0.030                       |
| 250     | 0.887 ± 0.031               | -4.760 ± 0.593                       |
|         | 1.831 ± 0.025               | -5.193 ± 0.031                       |
|         | 2.845 ± 0.052               | -5.182 ± 0.381                       |
|         | 3.969 ± 0.036               | -3.559 ± 0.058                       |
| 260     | 0.929 ± 0.028               | -4.225 ± 0.351                       |
|         | 1.923 ± 0.025               | -4.206 ± 0.062                       |
|         | 2.985 ± 0.048               | -4.108 ± 0.242                       |
|         | 4.112 ± 0.034               | -3.208 ± 0.075                       |
| 270     | 0.966 ± 0.027               | -3.732 ± 0.304                       |
|         | 1.995 ± 0.025               | -3.461 ± 0.079                       |
|         | 3.094 ± 0.043               | -3.315 ± 0.194                       |
|         | 4.235 ± 0.032               | -2.897 ± 0.080                       |
| 280     | 0.999 ± 0.026               | -3.240 ± 0.471                       |
|         | 2.057 ± 0.024               | -2.849 ± 0.088                       |
|         | 3.184 ± 0.039               | -2.675 ± 0.181                       |
|         | 4.349 ± 0.030               | -2.600 ± 0.076                       |
| 290     | 1.030 ± 0.025               | -2.707 ± 0.510                       |
|         | 2.113 ± 0.022               | -2.307 ± 0.092                       |
|         | 3.265 ± 0.034               | -2.121 ± 0.164                       |
|         | 4.461 ± 0.027               | -2.292 ± 0.061                       |
| 300     | 1.055 ± 0.025               | -2.216 ± 0.442                       |
|         | 2.156 ± 0.021               | -1.899 ± 0.091                       |
|         | 3.325 ± 0.029               | -1.711 ± 0.149                       |
|         | 4.555 ± 0.026               | -2.019 ± 0.040                       |

| $T$ [K] | $b$ [kg mol <sup>-1</sup> ] | $s_T \times 10^3$ [K <sup>-1</sup> ] |
|---------|-----------------------------|--------------------------------------|
| 310     | 1.075 ± 0.024               | -1.725 ± 0.292                       |
|         | 2.192 ± 0.019               | -1.563 ± 0.087                       |
|         | 3.375 ± 0.025               | -1.381 ± 0.134                       |
|         | 4.639 ± 0.025               | -1.758 ± 0.011                       |
| 320     | 1.092 ± 0.025               | -1.195 ± 0.058                       |
|         | 2.225 ± 0.018               | -1.266 ± 0.082                       |
|         | 3.419 ± 0.021               | -1.095 ± 0.118                       |
|         | 4.718 ± 0.026               | -1.487 ± 0.028                       |
| 330     | 1.102 ± 0.025               | -0.706 ± 0.213                       |
|         | 2.249 ± 0.016               | -1.042 ± 0.076                       |
|         | 3.451 ± 0.018               | -0.884 ± 0.104                       |
|         | 4.781 ± 0.028               | -1.248 ± 0.070                       |
| 340     | 1.107 ± 0.025               | -0.177 ± 0.552                       |
|         | 2.272 ± 0.015               | -0.844 ± 0.068                       |
|         | 3.480 ± 0.014               | -0.700 ± 0.091                       |
|         | 4.837 ± 0.034               | -1.000 ± 0.122                       |
| 350     | 1.106 ± 0.025               | 0.311 ± 0.899                        |
|         | 2.289 ± 0.013               | -0.694 ± 0.062                       |
|         | 3.501 ± 0.011               | -0.565 ± 0.079                       |
|         | 4.879 ± 0.041               | -0.781 ± 0.174                       |
| 360     | 1.100 ± 0.026               | 0.798 ± 1.273                        |
|         | 2.302 ± 0.012               | -0.572 ± 0.055                       |
|         | 3.518 ± 0.009               | -0.456 ± 0.069                       |
|         | 4.911 ± 0.051               | -0.570 ± 0.232                       |

**Table S15** Same as Table S14 for temperatures between 310 K and 360 K.

**Table S14** Same as Table S12 for  $\sigma_{Cl^-, +0.05} = 0.4901$  nm in the temperature interval between 240 K and 300 K.



| $T$ [K] | $b$ [kg mol <sup>-1</sup> ] | $s_T \times 10^3$ [K <sup>-1</sup> ] |
|---------|-----------------------------|--------------------------------------|
| 240     | 0.885 ± 0.026               | -4.622 ± 0.301                       |
|         | 2.200 ± 0.029               | -6.545 ± 0.188                       |
|         | 3.841 ± 0.043               | -3.536 ± 0.056                       |
| 250     | 0.923 ± 0.024               | -4.072 ± 0.267                       |
|         | 2.329 ± 0.033               | -5.267 ± 0.020                       |
|         | 3.969 ± 0.044               | -3.262 ± 0.046                       |
| 260     | 0.961 ± 0.023               | -3.477 ± 0.230                       |
|         | 2.446 ± 0.034               | -4.141 ± 0.083                       |
|         | 4.100 ± 0.045               | -2.965 ± 0.034                       |
| 270     | 0.991 ± 0.022               | -2.929 ± 0.196                       |
|         | 2.535 ± 0.032               | -3.297 ± 0.126                       |
|         | 4.213 ± 0.045               | -2.691 ± 0.035                       |
| 280     | 1.016 ± 0.020               | -2.381 ± 0.162                       |
|         | 2.608 ± 0.030               | -2.605 ± 0.134                       |
|         | 4.318 ± 0.044               | -2.417 ± 0.047                       |
| 290     | 1.039 ± 0.019               | -1.789 ± 0.125                       |
|         | 2.671 ± 0.027               | -1.997 ± 0.117                       |
|         | 4.422 ± 0.043               | -2.121 ± 0.061                       |
| 300     | 1.054 ± 0.018               | -1.242 ± 0.091                       |
|         | 2.717 ± 0.025               | -1.541 ± 0.086                       |
|         | 4.508 ± 0.041               | -1.848 ± 0.073                       |
| 310     | 1.064 ± 0.018               | -0.697 ± 0.104                       |
|         | 2.752 ± 0.023               | -1.167 ± 0.046                       |
|         | 4.583 ± 0.038               | -1.575 ± 0.085                       |

**Table S16** Soret coefficient as a function of LiCl molality of the system with the molar mass inverted,  $M_{Li^+} = 35.453 \text{ g mol}^{-1}$  and  $M_{Cl^-} = 6.941 \text{ g mol}^{-1}$ , in the temperature range between 240 K and 310 K. NEMD simulation were performed using the system equilibrated at an average pressure of 500 bar.

| $T$ [K] | $b$ [kg mol <sup>-1</sup> ] | $s_T \times 10^3$ [K <sup>-1</sup> ] |
|---------|-----------------------------|--------------------------------------|
| 320     | 1.068 ± 0.018               | -0.106 ± 0.138                       |
|         | 2.781 ± 0.023               | -0.838 ± 0.003                       |
|         | 4.651 ± 0.034               | -1.280 ± 0.099                       |
| 330     | 1.067 ± 0.017               | 0.438 ± 0.168                        |
|         | 2.800 ± 0.024               | -0.591 ± 0.049                       |
|         | 4.703 ± 0.030               | -1.007 ± 0.111                       |
| 340     | 1.059 ± 0.018               | 1.027 ± 0.202                        |
|         | 2.814 ± 0.026               | -0.374 ± 0.098                       |
|         | 4.746 ± 0.024               | -0.713 ± 0.124                       |
| 350     | 1.045 ± 0.018               | 1.570 ± 0.233                        |
|         | 2.822 ± 0.029               | -0.211 ± 0.142                       |
|         | 4.772 ± 0.018               | -0.441 ± 0.137                       |
| 360     | 1.027 ± 0.019               | 2.112 ± 0.263                        |
|         | 2.826 ± 0.034               | -0.078 ± 0.183                       |
|         | 4.786 ± 0.012               | -0.170 ± 0.149                       |

**Table S17** Same as Table S16 for temperatures between 320 K and 360 K.

| $T$ [K] | $b$ [kg mol <sup>-1</sup> ] | $s_T \times 10^3$ [K <sup>-1</sup> ] |
|---------|-----------------------------|--------------------------------------|
| 240     | 1.001 ± 0.032               | -1.910 ± 0.569                       |
|         | 2.541 ± 0.067               | -2.185 ± 0.862                       |
|         | 4.041 ± 0.078               | -4.579 ± 0.573                       |
| 250     | 1.018 ± 0.027               | -1.555 ± 0.475                       |
|         | 2.590 ± 0.050               | -1.817 ± 0.609                       |
|         | 4.199 ± 0.062               | -3.446 ± 0.350                       |
| 260     | 1.032 ± 0.023               | -1.171 ± 0.372                       |
|         | 2.635 ± 0.037               | -1.436 ± 0.387                       |
|         | 4.331 ± 0.052               | -2.501 ± 0.191                       |
| 270     | 1.042 ± 0.020               | -0.817 ± 0.278                       |
|         | 2.667 ± 0.030               | -1.099 ± 0.225                       |
|         | 4.422 ± 0.047               | -1.832 ± 0.098                       |
| 280     | 1.049 ± 0.018               | -0.463 ± 0.184                       |
|         | 2.691 ± 0.026               | -0.776 ± 0.098                       |
|         | 4.489 ± 0.045               | -1.312 ± 0.041                       |
| 290     | 1.052 ± 0.016               | -0.080 ± 0.082                       |
|         | 2.709 ± 0.025               | -0.442 ± 0.007                       |
|         | 4.540 ± 0.045               | -0.879 ± 0.037                       |
| 300     | 1.051 ± 0.016               | 0.272 ± 0.074                        |
|         | 2.716 ± 0.026               | -0.147 ± 0.074                       |
|         | 4.572 ± 0.045               | -0.572 ± 0.040                       |
| 310     | 1.046 ± 0.016               | 0.624 ± 0.107                        |
|         | 2.716 ± 0.029               | 0.137 ± 0.119                        |
|         | 4.592 ± 0.046               | -0.333 ± 0.039                       |

**Table S18** Same as Table S16 for  $M_{Li^+} = M_{Cl^-} = 35.453$  g mol<sup>-1</sup>, in the range of temperature between 240 K and 310 K.

| $T$ [K] | $b$ [kg mol <sup>-1</sup> ] | $s_T \times 10^3$ [K <sup>-1</sup> ] |
|---------|-----------------------------|--------------------------------------|
| 320     | 1.037 ± 0.018               | 1.005 ± 0.208                        |
|         | 2.708 ± 0.033               | 0.430 ± 0.145                        |
|         | 4.603 ± 0.046               | -0.134 ± 0.033                       |
| 330     | 1.026 ± 0.020               | 1.357 ± 0.302                        |
|         | 2.694 ± 0.036               | 0.689 ± 0.151                        |
|         | 4.605 ± 0.046               | 0.007 ± 0.025                        |
| 340     | 1.009 ± 0.024               | 1.736 ± 0.404                        |
|         | 2.671 ± 0.040               | 0.958 ± 0.141                        |
|         | 4.602 ± 0.046               | 0.124 ± 0.016                        |
| 350     | 0.991 ± 0.028               | 2.087 ± 0.497                        |
|         | 2.643 ± 0.043               | 1.195 ± 0.140                        |
|         | 4.595 ± 0.045               | 0.207 ± 0.028                        |
| 360     | 0.969 ± 0.032               | 2.436 ± 0.591                        |
|         | 2.610 ± 0.045               | 1.422 ± 0.178                        |
|         | 4.584 ± 0.043               | 0.272 ± 0.040                        |

**Table S19** Same as Table S18 for temperatures between 320 K and 360 K.

| $T$ [K] | $b$ [kg mol <sup>-1</sup> ] | $s_T \times 10^3$ [K <sup>-1</sup> ] |
|---------|-----------------------------|--------------------------------------|
| 240     | 0.838 ± 0.031               | -5.077 ± 0.574                       |
|         | 2.195 ± 0.039               | -5.619 ± 0.248                       |
|         | 3.707 ± 0.065               | -4.124 ± 0.200                       |
| 250     | 0.878 ± 0.028               | -4.603 ± 0.492                       |
|         | 2.307 ± 0.041               | -4.771 ± 0.183                       |
|         | 3.850 ± 0.060               | -3.717 ± 0.173                       |
| 260     | 0.919 ± 0.025               | -4.090 ± 0.404                       |
|         | 2.415 ± 0.042               | -3.996 ± 0.127                       |
|         | 3.994 ± 0.056               | -3.321 ± 0.149                       |
| 270     | 0.954 ± 0.023               | -3.618 ± 0.324                       |
|         | 2.502 ± 0.039               | -3.393 ± 0.175                       |
|         | 4.117 ± 0.052               | -2.993 ± 0.129                       |
| 280     | 0.985 ± 0.021               | -3.146 ± 0.243                       |
|         | 2.579 ± 0.036               | -2.881 ± 0.205                       |
|         | 4.232 ± 0.049               | -2.697 ± 0.111                       |
| 290     | 1.016 ± 0.019               | -2.635 ± 0.155                       |
|         | 2.651 ± 0.031               | -2.413 ± 0.217                       |
|         | 4.346 ± 0.045               | -2.410 ± 0.095                       |
| 300     | 1.039 ± 0.018               | -2.164 ± 0.075                       |
|         | 2.709 ± 0.026               | -2.049 ± 0.214                       |
|         | 4.443 ± 0.042               | -2.172 ± 0.082                       |
| 310     | 1.059 ± 0.018               | -1.694 ± 0.010                       |
|         | 2.759 ± 0.021               | -1.740 ± 0.202                       |
|         | 4.533 ± 0.040               | -1.957 ± 0.070                       |

**Table S20** Same as Table S18 for  $M_{Li^+} = M_{Cl^-} = 6.941$  g mol<sup>-1</sup>, in the range of temperature between 240 K and 310 K.

| $T$ [K] | $b$ [kg mol <sup>-1</sup> ] | $s_T \times 10^3$ [K <sup>-1</sup> ] |
|---------|-----------------------------|--------------------------------------|
| 320     | 1.075 ± 0.019               | -1.185 ± 0.093                       |
|         | 2.805 ± 0.016               | -1.457 ± 0.182                       |
|         | 4.621 ± 0.038               | -1.749 ± 0.060                       |
| 330     | 1.085 ± 0.021               | -0.716 ± 0.173                       |
|         | 2.842 ± 0.011               | -1.237 ± 0.160                       |
|         | 4.696 ± 0.036               | -1.576 ± 0.051                       |
| 340     | 1.090 ± 0.023               | -0.209 ± 0.259                       |
|         | 2.875 ± 0.007               | -1.036 ± 0.132                       |
|         | 4.770 ± 0.034               | -1.408 ± 0.043                       |
| 350     | 1.090 ± 0.027               | 0.259 ± 0.339                        |
|         | 2.902 ± 0.006               | -0.880 ± 0.106                       |
|         | 4.831 ± 0.033               | -1.269 ± 0.037                       |
| 360     | 1.085 ± 0.030               | 0.727 ± 0.419                        |
|         | 2.925 ± 0.009               | -0.747 ± 0.110                       |
|         | 4.888 ± 0.031               | -1.144 ± 0.031                       |

**Table S21** Same as Table S20 for temperatures between 320 K and 360 K.

| $b_{ave}$ [ $kg\ mol^{-1}$ ] | $T$ [K]             | $b$ [ $kg\ mol^{-1}$ ] |
|------------------------------|---------------------|------------------------|
| 0.97                         | $247.304 \pm 0.104$ | $0.963 \pm 0.031$      |
|                              | $261.645 \pm 0.096$ | $0.993 \pm 0.033$      |
|                              | $275.807 \pm 0.078$ | $1.013 \pm 0.034$      |
|                              | $289.851 \pm 0.081$ | $1.039 \pm 0.019$      |
|                              | $303.880 \pm 0.062$ | $1.049 \pm 0.019$      |
|                              | $317.901 \pm 0.067$ | $1.045 \pm 0.020$      |
|                              | $331.922 \pm 0.078$ | $1.022 \pm 0.015$      |
|                              | $346.069 \pm 0.080$ | $0.986 \pm 0.014$      |
| 1.49                         | $247.326 \pm 0.417$ | $1.456 \pm 0.035$      |
|                              | $260.961 \pm 1.511$ | $1.531 \pm 0.035$      |
|                              | $275.001 \pm 1.687$ | $1.580 \pm 0.025$      |
|                              | $288.978 \pm 1.832$ | $1.606 \pm 0.021$      |
|                              | $302.954 \pm 1.922$ | $1.609 \pm 0.022$      |
|                              | $316.979 \pm 1.907$ | $1.605 \pm 0.024$      |
|                              | $331.027 \pm 1.885$ | $1.581 \pm 0.028$      |
|                              | $345.150 \pm 1.883$ | $1.552 \pm 0.032$      |
| 2.01                         | $247.341 \pm 0.079$ | $1.966 \pm 0.048$      |
|                              | $261.712 \pm 0.077$ | $2.073 \pm 0.042$      |
|                              | $275.910 \pm 0.070$ | $2.123 \pm 0.031$      |
|                              | $290.006 \pm 0.064$ | $2.133 \pm 0.032$      |
|                              | $304.048 \pm 0.069$ | $2.156 \pm 0.028$      |
|                              | $318.091 \pm 0.073$ | $2.157 \pm 0.022$      |
|                              | $332.153 \pm 0.083$ | $2.148 \pm 0.026$      |
|                              | $346.346 \pm 0.074$ | $2.123 \pm 0.034$      |
| 2.56                         | $247.402 \pm 0.455$ | $2.495 \pm 0.036$      |
|                              | $261.113 \pm 1.149$ | $2.624 \pm 0.035$      |
|                              | $274.957 \pm 1.606$ | $2.715 \pm 0.034$      |
|                              | $288.766 \pm 1.858$ | $2.718 \pm 0.030$      |
|                              | $302.483 \pm 2.132$ | $2.748 \pm 0.029$      |
|                              | $316.286 \pm 2.606$ | $2.745 \pm 0.025$      |
|                              | $330.884 \pm 2.210$ | $2.748 \pm 0.024$      |
|                              | $345.608 \pm 1.920$ | $2.720 \pm 0.026$      |

**Table S22** Salt concentrations as a function of temperature for solutions in the concentrations range between 0.97 – 2.56 mol  $kg^{-1}$ . The data are obtained with the method implemented in GROMACS. The NEMD simulations were performed using the system equilibrated at an average pressure of 600 bar.

| $b_{ave}$ [ $kg\ mol^{-1}$ ] | $T$ [K]             | $b$ [ $kg\ mol^{-1}$ ] |
|------------------------------|---------------------|------------------------|
| 3.12                         | $247.402 \pm 0.113$ | $2.989 \pm 0.035$      |
|                              | $261.802 \pm 0.110$ | $3.138 \pm 0.046$      |
|                              | $276.079 \pm 0.099$ | $3.258 \pm 0.039$      |
|                              | $290.258 \pm 0.076$ | $3.329 \pm 0.032$      |
|                              | $304.395 \pm 0.088$ | $3.361 \pm 0.031$      |
|                              | $318.495 \pm 0.086$ | $3.366 \pm 0.028$      |
|                              | $332.617 \pm 0.088$ | $3.369 \pm 0.027$      |
|                              | $346.839 \pm 0.088$ | $3.360 \pm 0.026$      |
| 3.70                         | $247.395 \pm 0.142$ | $3.557 \pm 0.072$      |
|                              | $261.778 \pm 0.134$ | $3.701 \pm 0.041$      |
|                              | $276.007 \pm 0.132$ | $3.819 \pm 0.038$      |
|                              | $290.186 \pm 0.121$ | $3.901 \pm 0.042$      |
|                              | $304.291 \pm 0.121$ | $3.965 \pm 0.042$      |
|                              | $318.376 \pm 0.099$ | $3.977 \pm 0.031$      |
|                              | $332.497 \pm 0.085$ | $4.002 \pm 0.034$      |
|                              | $346.725 \pm 0.075$ | $4.012 \pm 0.039$      |
| 4.31                         | $247.169 \pm 0.109$ | $4.135 \pm 0.074$      |
|                              | $261.553 \pm 0.104$ | $4.286 \pm 0.040$      |
|                              | $275.798 \pm 0.105$ | $4.395 \pm 0.036$      |
|                              | $289.994 \pm 0.084$ | $4.476 \pm 0.040$      |
|                              | $304.126 \pm 0.077$ | $4.561 \pm 0.025$      |
|                              | $318.275 \pm 0.065$ | $4.624 \pm 0.034$      |
|                              | $332.441 \pm 0.052$ | $4.660 \pm 0.041$      |
|                              | $346.697 \pm 0.051$ | $4.673 \pm 0.035$      |
| 4.94                         | $247.163 \pm 0.165$ | $4.692 \pm 0.051$      |
|                              | $261.561 \pm 0.150$ | $4.851 \pm 0.053$      |
|                              | $275.840 \pm 0.139$ | $4.988 \pm 0.038$      |
|                              | $290.034 \pm 0.111$ | $5.098 \pm 0.043$      |
|                              | $304.197 \pm 0.112$ | $5.170 \pm 0.032$      |
|                              | $318.357 \pm 0.105$ | $5.243 \pm 0.041$      |
|                              | $332.549 \pm 0.098$ | $5.310 \pm 0.047$      |
|                              | $346.823 \pm 0.089$ | $5.347 \pm 0.048$      |

**Table S23** Same as Table S22 for the the solutions at average concentrations range between 3.12 – 4.9 mol  $kg^{-1}$ .

---

| $b_{ave}$ [ $kg\ mol^{-1}$ ] | $T$ [K]             | $b$ [ $kg\ mol^{-1}$ ] |
|------------------------------|---------------------|------------------------|
| 5.60                         | $247.372 \pm 0.168$ | $5.346 \pm 0.072$      |
|                              | $261.718 \pm 0.164$ | $5.502 \pm 0.050$      |
|                              | $275.955 \pm 0.153$ | $5.628 \pm 0.055$      |
|                              | $290.083 \pm 0.128$ | $5.761 \pm 0.036$      |
|                              | $304.228 \pm 0.116$ | $5.839 \pm 0.039$      |
|                              | $318.382 \pm 0.097$ | $5.935 \pm 0.040$      |
|                              | $332.567 \pm 0.094$ | $6.012 \pm 0.052$      |
|                              | $346.794 \pm 0.090$ | $6.080 \pm 0.060$      |

**Table S24** Same as Table S22 for the solution at average concentration  $5.6\ mol\ kg^{-1}$ .
